# Supplementary material
Source: publisher site journal article supplement (https://www.degruyterbrill.com/publication/journal_key/SATS/downloadAsset/SATS_SATS_Instructions%20for%20Authors.pdf)
Supplement: Supplementary file 1 [file SATS_SATS_Instructions%20for%20Authors.pdf]

# SATS

Northern European Journal of Philosophy

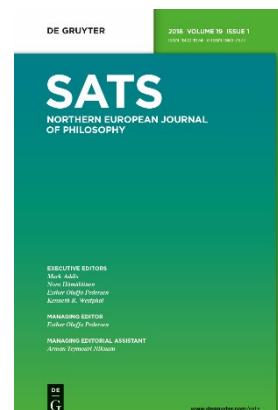

## Inhalt

|                                                           |   |
|-----------------------------------------------------------|---|
| SATS .....                                                | 1 |
| Northern European Journal of Philosophy .....             | 1 |
| Scope and general policies of the journal .....           | 3 |
| Scope .....                                               | 3 |
| <b>Article (manuscript) categories</b> .....              | 3 |
| Peer review, turnaround times and preprint policies ..... | 3 |
| <b>Peer review information</b> .....                      | 3 |
| <b>Turnaround time</b> .....                              | 4 |
| <b>Issue based publication</b> .....                      | 4 |
| <b>Appeals</b> .....                                      | 4 |
| <b>Preprint policy</b> .....                              | 4 |
| <b>Inclusive language policy</b> .....                    | 4 |
| Submission of manuscripts .....                           | 4 |
| <b>Author roles in ScholarOne Manuscripts</b> .....       | 4 |
| <b>Submission declaration and verification</b> .....      | 4 |
| <b>Scientific misconduct</b> .....                        | 5 |
| <b>Research integrity</b> .....                           | 5 |
| <b>ORCID</b> .....                                        | 5 |
| Post-acceptance .....                                     | 5 |
| <b>Galley proofs</b> .....                                | 5 |
| <b>Offprints</b> .....                                    | 5 |
| <b>Repository policy</b> .....                            | 6 |
| <b>Article Processing Charges (APCs)</b> .....            | 6 |
| <b>Acknowledgments</b> .....                              | 6 |
| Preparation of manuscript .....                           | 7 |
| <b>Title page</b> .....                                   | 7 |
| <b>Language</b> .....                                     | 7 |
| <b>General format and manuscript elements</b> .....       | 7 |
| Abstract .....                                            | 7 |
| Keywords .....                                            | 8 |
| Headings .....                                            | 8 |

|                                   |    |
|-----------------------------------|----|
| Figures and figure captions ..... | 8  |
| Tables and table captions .....   | 8  |
| Abbreviations .....               | 9  |
| Equations and symbols .....       | 9  |
| Audio and Video .....             | 9  |
| Appendices .....                  | 9  |
| Supplementary material .....      | 9  |
| References .....                  | 10 |

## Scope and general policies of the journal

### Scope

**SATS – Northern European Journal of Philosophy** publishes accessible, high-quality academic articles in all traditions and fields of philosophy. As a broad and inclusive philosophy journal, it is our mission to promote philosophical dialogue across disciplinary boundaries, within philosophy and with neighbouring fields. We welcome submissions from junior as well as senior scholars who in their work are aiming to promote philosophical dialogue. To achieve this, articles submitted to SATS should

- be jargon-free and written in clear accessible prose
- address a broad audience of philosophers and philosophically oriented academics
- seek to contextualise the philosophical questions addressed

Contemporary academic philosophy is characterised by increased specialisation and small technical and scholarly debates. Although such discussions are crucial for the development and growth of knowledge, they require a counterbalance in the form of texts and contexts of broader scope. We believe that original research in philosophy can be written in a non-technical, lucid style and that philosophical discussions have much to gain from such work. To support a fruitful exchange of ideas, we encourage authors to explicate technical issues, and to clarify the relevance of their work to non-specialists.

Our goal is to be a favourite publication venue for interdisciplinary philosophical debates. We welcome and support submissions that contextualise philosophy by bringing it into dialogue with other fields, for instance literary studies, history, sociology, anthropology, economics, mathematics or the natural sciences. We also believe that philosophy benefits from dealing with the immediate concerns of modern societies, and that modern societies benefit from more engaged forms of philosophy. In other words, SATS is happy to provide a venue for articles that put philosophy to work beyond specialised philosophical discussions.

SATS publishes two issues per year: A special issue in the spring and a regular issue in the autumn.

- Our *special issue* addresses a topic which has relevance for promoting philosophical dialogue and cross-disciplinary thinking. Please watch for calls for papers to special issues on our homepage.
- Our *regular issue* includes submissions from all fields of philosophy and a book review section. The book review section is especially dedicated to highlighting reviews with interdisciplinary relevance.

### Article (manuscript) categories

- Article
- Book Review

## Peer review, turnaround times and preprint policies

### Peer review information

SATS – Northern European Journal of Philosophy is a double-blind journal. Manuscripts are reviewed anonymously by at least two independent reviewers selected by the Editors. The authors may provide the names, institution, country and e-mail addresses of up to four potential reviewers. Reviewers indicated by the authors must be of institutions and countries different from the corresponding author. Authors may also provide names of reviewers they wish to exclude from reviewing their manuscripts.

The editors reserve the right to reject submitted manuscripts without peer review if the studies are not novel or important enough to merit publication in the journal. Manuscripts deemed unsuitable (insufficient originality or limited interest to the target audience) will be also rejected without review.

## Turnaround time

Upon submission, we aim to give authors swift feedback on the status of their manuscripts.

## Issue based publication

Articles are first published online as DOI citable articles and are later assigned to an issue with final page numbers.

## Appeals

Manuscripts that have been rejected for publication will be reconsidered only at the discretion of the Editor(s). Authors wishing to request reconsideration of a previously rejected manuscript must do so in written form and submit a rebuttal by e-mail to the journal's editorial office. Authors should provide detailed reasons why they believe the manuscript should be reconsidered. If the rebuttal is accepted, the author will be asked to re-submit the manuscript, or the decision will be reversed.

## Preprint policy

De Gruyter does not consider the following purposes of a paper as pre-publication: publication in the form of a congress abstract, publication as an academic thesis, publication as an electronic preprint on recognized servers such as arXiv, RePEc, bioRxiv, ResearchSquare, etc.

## Inclusive language policy

Inclusive language recognizes diversity, conveys respect for all people, is sensitive to differences and promotes equal opportunities. Content should not make assumptions about readers' beliefs or commitments; should not contain anything that might suggest that one person is superior to another because of age, gender, race, ethnicity, culture, sexual orientation, disability or health condition; and should use inclusive language throughout. Authors should ensure that their writing is free from prejudice, stereotypes, slang, references to the dominant culture and/or cultural assumptions.

We advise the following approach: Aim for gender neutrality by using plural nouns (clinicians, clients, participants) as standard and avoiding "he" or "she", wherever possible. Instead, please use "they". We recommend avoiding the use of descriptors that refer to personal characteristics such as age, gender, race, ethnicity, culture, sexual orientation, disability or health status unless they are relevant and valid.

## Submission of manuscripts

- Submit manuscripts exclusively online at: <https://mc.manuscriptcentral.com/sats>

## Author roles in ScholarOne Manuscripts

Submitting author: Submitting person.

Contact author: Author who receives all correspondence in the submission system.

Corresponding author: Author identified as Corresponding Author at the time of submission and contact person for all post-acceptance concerns, i.e., proof correction, open access procedures and post-publication research-related issues.

In most cases, this is one and the same person.

## Submission declaration and verification

For information on plagiarism, please refer to [COPE – Committee of Publication Ethics](#). Submission of a manuscript to a journal implies that the work described has not been published previously, except in the form of an abstract, academic thesis, lecture, or preprint; that it is not under consideration for publication elsewhere (multiple, redundant, concurrent publication); that publication of the work is approved by all

authors and tacitly or explicitly by the responsible authorities where the work was carried out; and that, if accepted, it will not be published elsewhere, in English, German, or in any other language, without the written consent of the Publisher. Exceptions are listed under Preprint policy.

To exclude potential overlap with prior publication(s), your manuscript may be checked by the plagiarism checker Crossref Similarity Check, [iThenticate](#). Previously published material must be referenced appropriately in the manuscript, regardless of whether the material was previously published in a subscription based, hybrid or open access journal, or in another language.

### Scientific misconduct

Only articles that have not been or will not be published elsewhere will be published in the journal, excluding articles that fall under De Gruyter's [Repository Policy](#). Multiple submissions/publications or redundant publications (i.e., republication of data already published by the same authors) will be rejected. If identified after publication, the journal reserves the right to publish a retraction note. In any case, editors will follow COPE's Code of Conduct and implement its advice.

### Research integrity

The authors are responsible for all aspects of the study and will ensure that any questions regarding the accuracy and integrity of any part of the work are adequately investigated and resolved. In case of doubt, the Editorial Board reserves the right to ask the authors to submit the raw experimental data.

### ORCID

The ORCID (Open Researcher and Contributor ID) is a non-profit, publisher-independent system that is used to uniquely identify academics and their publications. Click [here](#) for detailed information about ORCID. Submitting authors can login with username and password. If the journal uses ScholarOne as submission tool, authors can also login with their ORCID number. Providing an ORCID number for each author is strongly recommended. ORCID numbers should be listed on the title page.

## Post-acceptance

### Galley proofs

#### Via production tool (online proof correction)

*Online proofreading:* The corresponding author of an article receives the galley proofs in electronic form to check them for editing and typesetting accuracy. Corresponding authors receive an e-mail notification ("Check your proof") with a link to the online proofreading system (Proof Central) through which they can access their galley proofs. The interface is similar to MS Word: authors can edit the text by entering their corrections directly, adding comments, and answering questions from the copy editor. If preferred, authors can also annotate and upload edits to the PDF version.

All instructions for proof corrections, including deadlines, will be given in the e-mail notification to the corresponding author, along with a user guide, providing step-by-step instructions for inserting corrections.

Substantial changes to an article accepted for publication will only be considered with the permission of the Editor or after additional peer review. The responsibility for proofreading lies solely with the authors. **According to De Gruyter policy, once an article has been accepted, no changes to the author list and article title are allowed (except typos). The De Gruyter production team is instructed to enforce this policy during the production/proof correction process.**

### Offprints

Electronic files of typeset articles in Adobe Acrobat PDF format are provided free of charge. The corresponding author will receive an e-mail notification when the article has been published online along with instructions on how to access the article.

## Repository policy

Policies for sharing published journal articles differ for subscription-based and open access articles.

### Subscription-based and hybrid journals

[Repository Policy](#) Authors may publish their articles in a public repository after an embargo period of 12 months. Only the accepted author version of the manuscript, not the PDF version of the published article, can be published:

Immediately

- via their non-commercial personal website, blog or social media channels
- by updating a preprint in arXiv, RePEc, bioRxiv, ResearchSquare, etc. with the version of the accepted manuscript
- as a closed deposit via their research institute or institutional repository for internal institutional purposes or as part of an invitation-only research collaboration workgroup
- directly by providing copies to their students or to research collaborators for their personal use
- for private scholarly sharing as part of an invitation-only work group

After an embargo period

- as open deposits to institutional or subject repositories
- to scholarly collaboration networks (SCNs)

De Gruyter journals have the following embargo periods after online publication:

- Social Sciences and Humanities: 12 months
- Science, Technology, Engineering and Mathematics: 12 months
- Medicine: 6 months

## Copyright

Manuscripts are accepted on condition of transfer of copyright ([Copyright Transfer Agreement](#)) (for U.S. government employees: to the extent transferable) to the publisher. Once the manuscript has been accepted, it may not be published elsewhere without the consent of the copyright holders.

### Open Access in hybrid journals

The author declares as a precautionary measure consent to place the article under the Creative Commons license CC-BY 4.0. In this case, the exclusive rights previously granted to the publisher will be converted into non-exclusive rights. The author confirms that they have already acquired all necessary rights for all components of the work in the event of an open access publication. For more information, refer to paragraph 5 in the [Copyright Transfer Agreement](#).

## Article Processing Charges (APCs)

Authors publishing in **hybrid journals** do not have to pay APCs if they do not wish to publish their article open access. After acceptance and before production of an article, authors can decide whether to publish their article open access. Only if they decide to publish open access, APCs will be charged. All articles are peer-reviewed and accepted for publication based on the quality of their scientific contribution. The decision to publish open access does not affect the peer review process or the acceptance of the article. For more information on De Gruyter's open access policy, please read our [Open Access Policies](#).

## Acknowledgments

Authors may wish to acknowledge individuals, working groups, institutions, etc. who provided help and support (other than financial) during research and the preparation of the manuscript (e.g., language checking, writing assistance or proof reading of the article, etc.). Individuals acknowledged are not included on the title page, as a footnote to the title or otherwise.

## Preparation of manuscript

### Title page

Please provide a title page as a separate Word/TeX-file during submission process including the following information:

- Authors names

Write at least one given and family name in full. For all other names, initial is sufficient. List authors in the order you want them to appear in the final version. Indicate the corresponding author by using an asterisk “\*” after the family name. Please note that as per De Gruyter policy, no author list changes are permitted after acceptance of a manuscript.

Author footnotes (superscript letters or numbers) to explain authorship details are not all allowed in the author line and will be converted to an author note on the first page. Kindly stick to the wording as in the examples below:

- [Full name author A] and [full name author B] contributed equally to this work.
- [Full name author A] and [full name author B] contributed equally to this work and share first authorship.
- [Full name author A] and [full name author B] share senior authorship.
- [Full name author A] and [full name author B] share first authorship.

- Title and short title

Provide a descriptive, concise and comprehensible main title as well as an abbreviated form of the main title (running head) with no more than 40 characters (including blanks). The short title will be displayed on the top of each page of the final version.

The article title and subtitle should be in title case. Use uppercase letters after colon.

- Affiliations

For the corresponding author supply the following details: e-mail address, department, institution, street, city, postal code and country; for all other authors department, institution, city, postal code and country are mandatory. Please also provide all details concerning the current institutional affiliation, in case you changed affiliation during the manuscript preparation and publication process.

Supplying an ORCID is highly recommended (for more information and registration, please visit the ORCID webpage: <https://info.orcid.org/benefits-for-researchers/>)

- Please also indicate the word count, number of tables and figures, and whether your manuscript contains supplementary material.

### Language

All manuscripts must be written in clear and concise English. Please use British or American English consistently. If you have reasons to doubt your proficiency with respect to spelling, grammar, etc. (e.g., because English is not your native language), then you may wish to employ—at your expense—the services of a professional language editor.

### General format and manuscript elements

#### Abstract

Give a concise summary of your article in an abstract of approx. 200 words in a single paragraph. As abstracts are published separately by abstracting and indexing services, please spell out abbreviations at first use and do not include footnotes, tables, figures or equations. Avoid using references. If it is essential to use a reference in the abstract, please expand it as per journal reference style.

**Keywords**

Keywords are used by abstracting and indexing services as well as search engines to facilitate finding your paper. Together with the abstract of your paper, they are a key tool enabling readers to find your paper and for increasing citations.

Supply 3–5 specific keywords in alphabetical order and lower case, separated by comma.

These can be single words, but also short phrases representing the content. Make sure to select precise and concise keywords to your field or sub-field of research. Avoid abbreviations and the repetition of words already used in the article's title.

**Headings**

Your manuscript should be subdivided into sections (and, if necessary, subsections). These sections should be labeled with headings in a consistent format and with a clear hierarchy of section headings. Limit your subsections to a maximum of four levels. For subdivided sections ensure that they have at least two subheadings on one level. Headings do not have an end period.

Headings should be numbered and in title case. Use uppercase letters after colon, even for articles.

**Figures and figure captions**

Graphs, line drawings, photographs, schemes, diagrams, etc. may be used to illustrate your findings.

Publication of color figures is provided free of charge in both online and print editions. The publication quality always depends directly on the quality and size of the delivered data.

Please label the illustrations as “Figure”. Each figure should be uploaded separately as .jpg, .eps, .png or .tiff file. Images should have a minimum resolution of 300 dpi (color or black-white pixel graphics/half-tone images) in the intended size (600dpi combination of pixel graphic and line drawing, 1200dpi for line drawings). When drawing bar graphs, use patterning/color instead of grey scales (faint shading may be lost upon reproduction). Figures should not display any frames.

Figures should be numbered consecutively using Arabic numerals (from 1) throughout the text. If you include multi-part figures, please make sure to label all part figures by using lowercase letters in brackets. Please make sure that all figures are explicitly referred to in the text. Do not end the text immediately preceding the suggested positioning of a figure with a colon and avoid expressions such as “in Figure 1 below/above”, as the exact positioning of these elements cannot be determined until after the manuscript has been typeset. Note that figures will usually be placed on the top or the bottom of the page in the final layout.

Provide a concise and self-explanatory caption for each figure. In case of multi-part figures, please include a main caption as well as part figure captions.

The key to the symbols depicted in the figures should be included in the figure itself, where possible.

Otherwise, include it in the caption. The caption itself should not be included in the figure.

Please make sure that letters, numbers, symbols, text, etc. included in the figure are clear, easy to read (not below 6pt, preferably in Arial or Helvetica) and uniform in style.

It is the authors' responsibility to use images that do not infringe on any copyrights, performing rights, trademark rights, personal rights or any other third-party rights or are otherwise unlawful. Copyright permissions can be obtained through the Copyright Clearance Center (<https://www.copyright.com/>).

**Tables and table captions**

Number tables consecutively using Arabic numerals. Tables should be provided in an editable source format (Word, LaTeX). Please avoid handing in tables as image or Excel files.

Provide a short descriptive title, column heads, and (if necessary) footnotes to make each table self-explanatory. In column heads, separate units with a comma and use parentheses or square brackets for additional measures (e.g., %, range, etc.). Use footnotes in alphabetical order (a, b, c, etc.) to give emphasis or further information. Expand abbreviations used in tables in footnotes.

In case bold type or italics are used to highlight information, please explain their meaning.



Avoid color, shading, vertical lines, and other cell borders. Note that most horizontal lines within the table body will be removed during the production process.

Indicate where to place the table approximately (e.g., [Place Table 1 near here]). Do not end the text immediately preceding the suggested positioning of a table with a colon and avoid expressions such as “in Table 1 below/above”, as the exact positioning of these elements cannot be determined until after the manuscript has been typeset. Note that tables will usually be placed on the top or the bottom of the page in the final layout.

### Abbreviations

*SATS – Northern European Journal of Philosophy* accepts standard abbreviations. The use of abbreviations and acronyms is permitted given that they are expanded in full when used the first time with the abbreviation in parentheses (applies to abstract and main text). Please use them consistently thereafter. Avoid using non-standard abbreviations unless they appear more than three times in the text. We recommend providing a list with an overview of all abbreviations.

### Equations and symbols

Equations should be well-aligned and not crowded. Use only Latin and Greek alphabets. Avoid complicated superscripts and subscripts by introducing new symbols. Avoid repetition of a complicated expression by representing it with a symbol. For MS Word submissions create equations using the Microsoft equation editor or a corresponding add-on. Do not submit math equations as images, but as editable text. Number displayed equations consecutively with Arabic numerals (if referred to in the text).

### Audio and Video

For all examples connected to an audio/video recording, supply audio/video clips. Deliver these clips as separate files and do not integrate them directly into the manuscript.

Name all your clips using the following convention:

e.g., audio-1-smith.MP3, video-1-smith.MP4,

[media]-[identifier]-[author-family-name].[extension]

Indicate the position in the article by placing a marker as follows:

[associated audio-1-smith.wav with example (1)]

Provide a short caption for each media file and number them consecutively. Any other media files can be included as part of the supplementary material.

File naming: audiosupplement-1-smith.MP3,

[media.supplement]-[identifier]-[author-family-name].[extension]

The following formats are preferred: audio files in MP3 (at least 16 bit) and video files in MP4 (at least a height of 480 pixels and a frame rate of 25). However, other common formats are also permitted.

### Appendices

Use appendices for information that supports your findings but is not essential for the understanding of your paper (e.g., lengthy mathematical proofs, questionnaires, graphics, correspondence with other researchers). Cite appendices within the main text. Tables and figures in the appendix should be numbered consecutively as follows: Figure A.1, Table A.1, Figure A.2, Table A.2, etc. The appendix is placed at the end of the main text before the reference list.

### Supplementary material

Supplementary material which may offer further information on your work, but cannot be printed in view of its scope, can be published online only. Supplementary material may contain extensive tables, additional figures, questionnaires for discussed surveys, protocols, code samples, datasets, multimedia files (audio, video, animations), etc. If the manuscript is accepted, supplementary material will be referenced in the print version, but will be published online only.

Please provide supplementary material data as separate file(s) of no more than 10 MB during submission.

Note that the material should be publication-ready (not in track-changes mode), as it will not be typeset, but published exactly as supplied. Within the text, the supplementary material must be cited consecutively and be referred to as supplementary material data (e.g., see Supplementary Material, Fig. 1).

## References

References are given at the end of the article including all relevant information. Sample references are provided below. For purposes of original submission and editorial review, it suffices that the submission use one consistent, standard style and format throughout.

As part of the publication process, it is expected and required that the author edit the manuscript to conform with these style guidelines.

## SAMPLE REFERENCES

### Book, one author

Westfall, Richard S. 1980. *Never at Rest: A Biography of Isaac Newton*. Cambridge, Cambridge University Press.

### Book, multiple authors

Kohlstedt, Sally Gregory, Michael M. Sokal, and Bruce V. Lewenstein. 1999. *The Establishment of Science in America: 150 Years of the American Association for the Advancement of Science*. Piscataway, NJ, Rutgers University Press.

### Reprint

Hume, David. 1740. *A Treatise of Human Nature*. London; P. H. Nidditch, ed., Oxford: The Clarendon Press, 1975, 2nd ed.

### Book Chapter

Friedman, Michael. 2003. "Hempel and the Vienna Circle." In: A.W. Richardson and G.L. Hardcastle, eds., *Logical Empiricism in North America* (Minneapolis, University of Minnesota Press), 94–114.

### Journal Article

Burian, Richard M. 1977. "More than a Marriage of Convenience." *Philosophy of Science* 44.1: 1–42.

### Multiple Works by Single Author

McMullin, Ernan. 1985. "Openness and Secrecy in Science: Some Notes on Early History." *Science, Technology, and Human Values* 10.2:14–23.

———. 1990. "Conceptions of Science in the Scientific Revolution." In: D.C. Lindberg and R.S. Westman, eds., *Reappraisals of the Scientific Revolution* (Cambridge, Cambridge University Press), 27–92.

### Translations

Duhem, Pierre. 1914. *The Aim and Structure of Physical Theory*, 2<sup>nd</sup> ed.. P. Wiener, tr., Princeton, NJ: Princeton University Press, 1954. Originally published as *La théorie physique, son objet et sa structure* (Paris, Chevalier et Rivière), 1906; 2<sup>nd</sup> rev. ed. 1914.

Menchú, Rigoberta. 1999. *Crossing Borders*. A. Wright, ed. & tr. New York, Verso.

Lavoisier, Antoine-Laurent. 1965. *The Elements of Chemistry*. R. Kerr, tr.. New York, Dover. Originally published as *Traité Élémentaire de Chimie* (Paris, 1793).

**Please contact the Editors for any further questions:**

sats.editorial@degruyter.com
